# Supplementary material
Source: Elsevier journal article supplement (https://www.sciencedirect.com/science/article/pii/S0001731022007608)

Table 1: Summary of Included Studies

| Body region affected by psoriasis | Author, year    | Study                                                                                                                                                                              | Quality of life scale                              | Quality of life value |
|-----------------------------------|-----------------|------------------------------------------------------------------------------------------------------------------------------------------------------------------------------------|----------------------------------------------------|-----------------------|
| Scalp/head                        | Andreassi, 2003 | Efficacy of betamethasone valerate mousse in comparison with standard therapies on scalp psoriasis: an open, multicentre, randomized, controlled, cross-over study on 241 patients | Modified Finlay–Kahn questionnaire (modified DLQI) |                       |
|                                   | Augustin, 2018  | Topology of psoriasis in routine care: results from high-resolution analysis of 2009 patients                                                                                      | DLQI                                               | 8·0 ± 6·6             |
|                                   | Bahraini, 2018  | Turmeric tonic as a treatment in scalp psoriasis: A randomized placebo-control clinical trial                                                                                      | DLQI                                               | 4                     |

|  |                     |                                                                                                                                                                                                              |      |                                |
|--|---------------------|--------------------------------------------------------------------------------------------------------------------------------------------------------------------------------------------------------------|------|--------------------------------|
|  | Callis-Duffin, 2021 | Characterization of Patients with Psoriasis in Challenging-to-Treat Body Areas in the Corrona Psoriasis Registry                                                                                             | DLQI | 8.96 (8.88–9.04)               |
|  | Egeberg, 2020       | Epidemiology of psoriasis in hard-to-treat body locations: data from the Danish skin cohort                                                                                                                  | DLQI | 4.7 ± 5.2                      |
|  | Gual, 2016          | Topical treatment for scalp psoriasis: Comparison of patient preference, quality of life and efficacy for non-alcoholic mometasone emulsion versus calcipotriol/betamethasone gel in daily clinical practice | DLQI | 8.45                           |
|  | Imafuku, 2021       | Utility of the Dermatology Life Quality Index at initiation or switching of biologics in real-life Japanese patients with plaque psoriasis: Results from the ProLOGUE study                                  | DLQI | 7 (3-12)<br>(median and range) |
|  | Khobzey, 2017       | Effectiveness of adalimumab in the treatment of scalp and nail affection in patients with moderate to severe plaque psoriasis in routine clinical practice                                                   | DLQI | 20.6                           |

|  |                    |                                                                                                                                                                                             |       |             |
|--|--------------------|---------------------------------------------------------------------------------------------------------------------------------------------------------------------------------------------|-------|-------------|
|  |                    |                                                                                                                                                                                             |       |             |
|  | Ohata, 2019        | Fingernail Involvement is a Bigger Burden Than Face and Scalp Involvement in Patients With Psoriasis                                                                                        | DLQI  | 4.9 ± 4.9   |
|  | Radtke, 2019       | Real-world experience with apremilast: Analysis of 250 patients from the APPRECIATE study with psoriasis in difficult-to-treat areas                                                        | DLQI  | 14 ± 7.5    |
|  | Rencz, 2014        | Moderate to severe psoriasis patients' subjective future expectations regarding health-related quality of life and longevity                                                                | EQ-5D | 0.64 (0.29) |
|  | Thaci, 2015        | Adalimumab for the treatment of moderate to severe psoriasis: subanalysis of effects on scalp and nails in the BELIEVE study                                                                | DLQI  | 14.1 ± 7.5  |
|  | Van Voorhees, 2020 | Efficacy and safety of apremilast in patients with moderate to severe plaque psoriasis of the scalp: Results of a phase 3b, multicenter, randomized, placebo-controlled, double-blind study | DLQI  | 12.6        |
|  | Vaughn, 2019       | Impact of scalp psoriasis on quality of life measurements at baseline and following treatment with ixekizumab                                                                               | DLQI  | 12.7        |

|                    |                |                                                                                                                                                       |       |              |
|--------------------|----------------|-------------------------------------------------------------------------------------------------------------------------------------------------------|-------|--------------|
|                    | Zhou, 2018     | Efficacy assessment of UVA1 and narrowband UVB for treatment of scalp psoriasis                                                                       | DLQI  | 20.6         |
|                    |                |                                                                                                                                                       |       |              |
| Neck/décoll<br>eté | Augustin, 2018 | Topology of psoriasis in routine care: results from high-resolution analysis of 2009 patients                                                         | DLQI  | 8.9 ± 6.9    |
|                    | Heredi, 2014   | Exploring the relationship between EQ-5D, DLQI and PASI, and mapping EQ-5D utilities: a cross-sectional study in psoriasis from Hungary               | EQ-5D | 0.48 ± 0.34  |
|                    |                |                                                                                                                                                       | DLQI  | 14.28 ± 5.95 |
|                    | Jung, 2018     | The association of socioeconomic and clinical characteristics with health-related quality of life in patients with psoriasis: a cross-sectional study | DLQI  | 16.0 ± 7.5   |
| Facial             | Augustin, 2018 | Topology of psoriasis in routine care: results from high-resolution analysis of 2009 patients                                                         | DLQI  | 8.2 ± 6.6    |
|                    | Egeberg, 2020  | Epidemiology of psoriasis in hard-to-treat body locations: data from the Danish skin cohort                                                           | DLQI  | 5.6 ± 5.5    |

|  |              |                                                                                                                                                                   |       |             |
|--|--------------|-------------------------------------------------------------------------------------------------------------------------------------------------------------------|-------|-------------|
|  | Heredi, 2014 | Exploring the relationship between EQ-5D, DLQI and PASI, and mapping EQ-5D utilities: a cross-sectional study in psoriasis from Hungary                           | EQ-5D | 0.57 ± 0.37 |
|  |              |                                                                                                                                                                   | DLQI  | 11.2 ± 7.38 |
|  | Jung, 2018   | The association of socioeconomic and clinical characteristics with health-related quality of life in patients with psoriasis: a cross-sectional study             | DLQI  | 14.4 ± 8.2  |
|  | Ohata, 2019  | Fingernail Involvement is a Bigger Burden Than Face and Scalp Involvement in Patients With Psoriasis                                                              | DLQI  | 5.5 ± 5.5   |
|  | Passos, 2019 | Facial involvement and the severity of psoriasis                                                                                                                  | DLQI  | 7.5         |
|  | Paul, 2017   | Impact of ixekizumab on facial psoriasis and related quality of life measures in moderate-to-severe psoriasis patients: 12-week results from two phase III trials | DLQI  | 12.9 ± 7.2  |

|       |                                                |                                                                                                                 |      |                      |
|-------|------------------------------------------------|-----------------------------------------------------------------------------------------------------------------|------|----------------------|
|       | Sharifah<br>Rosniza Syed<br>Nong Chek,<br>2016 | Clinical characteristics of patients with facial psoriasis in Malaysia                                          | DLQI | 9.96                 |
|       | Sojevic<br>Timotijevic,<br>2013                | Identification of psoriatic patients at risk of high quality of life impairment                                 | DLQI | 11.5                 |
|       |                                                |                                                                                                                 | PDI  | 15.1                 |
|       | Zaghloul, 2004                                 | Objective Assessment of Compliance With Psoriasis Treatment                                                     | DLQI | 23.8 ± 3.3           |
| Nails | Augustin, 2018                                 | Topology of psoriasis in routine care: results from high-resolution analysis of 2009 patients                   | DLQI | 8.2 ± 6.7            |
|       | Callis-Duffin,<br>2021                         | Characterization of Patients withPsoriasis in Challenging-to-Treat Body Areas in the Corrona Psoriasis Registry | DLQI | 9.39 (9.30–<br>9.47) |

|  |               |                                                                                                                                                                             |                         |             |
|--|---------------|-----------------------------------------------------------------------------------------------------------------------------------------------------------------------------|-------------------------|-------------|
|  | Egeberg, 2020 | Epidemiology of psoriasis in hard-to-treat body locations: data from the Danish skin cohort                                                                                 | DLQI                    | 5.6 ± 5.2   |
|  | Heredi, 2014  | Exploring the relationship between EQ-5D, DLQI and PASI, and mapping EQ-5D utilities: a cross-sectional study in psoriasis from Hungary                                     | EQ-5D                   | 0.60 ± 0.35 |
|  |               |                                                                                                                                                                             | DLQI                    | 9.61 ± 7.29 |
|  | Imafuku, 2021 | Utility of the Dermatology Life Quality Index at initiation or switching of biologics in real-life Japanese patients with plaque psoriasis: Results from the ProLOGUE study | DLQI (median and range) |             |
|  |               |                                                                                                                                                                             | Fingernail              |             |
|  |               |                                                                                                                                                                             | Toenail                 | 7 (3-12)    |
|  |               |                                                                                                                                                                             |                         | 7 (4-13)    |

|  |                 |                                                                                                                                                            |                                    |                |
|--|-----------------|------------------------------------------------------------------------------------------------------------------------------------------------------------|------------------------------------|----------------|
|  | Khobzey, 2017   | Effectiveness of adalimumab in the treatment of scalp and nail affection in patients with moderate to severe plaque psoriasis in routine clinical practice | DLQI                               | 20.2           |
|  | Klaassen, 2014  | Nail Psoriasis, the unknown burden of disease                                                                                                              | DLQI                               | 4.9 ± 5.0      |
|  |                 |                                                                                                                                                            | NPQ10                              | 9.9 ± 14.0     |
|  | Kokolakis, 2020 | Efficacy of Adalimumab for Nail Psoriasis During 24 Months of Continuous Therapy                                                                           | DLQI                               | 12.7±7.7       |
|  | Kyriakou, 2014  | Quality of life and severity of skin and nail involvement in patients with plaque psoriasis                                                                | DLQI (mean and standard deviation) | 4.44 ± 2.89    |
|  |                 |                                                                                                                                                            | DLQI (median and range)            | 5.0 (1.0-12.0) |
|  |                 |                                                                                                                                                            |                                    |                |



|  |                   |                                                                                                                                    |                          |                 |
|--|-------------------|------------------------------------------------------------------------------------------------------------------------------------|--------------------------|-----------------|
|  |                   |                                                                                                                                    | NPQ10 (mean and s.d.)    | 16.38 ± 8.00    |
|  |                   |                                                                                                                                    | NPQ10 (median and range) | 17.5 (5.0-30.0) |
|  | Lanna, 2020       | Apremilast as a target therapy for nail psoriasis: a real-life observational study proving its efficacy in restoring the nail unit | DLQI                     | 19.3 ± 9.2      |
|  | Ghajarzadeh, 2011 | Depression and quality of life in psoriasis and psoriatic arthritis patients                                                       | DLQI                     | 13.3 ± 10.01    |
|  |                   |                                                                                                                                    | SF-36                    | 68.4 ± 24.2     |
|  | Luger, 2009       | Sustained improvement in joint pain and nail symptoms with etanercept therapy in patients with moderate-to-severe psoriasis        | DLQI                     | 13.59           |
|  |                   |                                                                                                                                    | EQ-5D utility            | 0.65            |

|  |               |                                                                                                          |                      |           |
|--|---------------|----------------------------------------------------------------------------------------------------------|----------------------|-----------|
|  | Moradi, 2014  | A comaprative cross-sectional study on health-related quality of life in psoriasis from Hungary and Iran | EQ-5D                | 0.47±0.4  |
|  | Ohata, 2019   | Fingernail Involvement is a Bigger Burden Than Face and Scalp Involvement in Patients With Psoriasis     | DLQI (mean and s.d.) | 4.8 ± 4.5 |
|  | Ortonne, 2009 | Development and validation of nail psoriasis quality of life scale (NPQ10)                               |                      |           |
|  |               | Fingernails                                                                                              |                      |           |
|  |               |                                                                                                          | DLQI                 | 4.99      |
|  |               |                                                                                                          | NPQ10                | 10.4      |
|  |               | Toenails                                                                                                 |                      |           |
|  |               |                                                                                                          |                      | 6.19      |
|  |               |                                                                                                          | DLQI                 | 12.9      |
|  |               |                                                                                                          | NPQ10                |           |
|  |               | Fingernails and toenails                                                                                 |                      |           |

|  |               |                                                                                                                                                               |                         |                  |
|--|---------------|---------------------------------------------------------------------------------------------------------------------------------------------------------------|-------------------------|------------------|
|  |               |                                                                                                                                                               | DLQI                    | 9.02             |
|  |               |                                                                                                                                                               | NPQ10                   | 18.8             |
|  | Peruzzo, 2017 | Nail psoriasis treated with pulsed dye laser                                                                                                                  | DLQI (median and range) | 2.5 (1.0 - 11.5) |
|  | Poulin, 2013  | Efficacy of adalimumab across subgroups of patients with moderate-to-severe chronic plaque psoriasis of the hands and/or feet: post hoc analysis of REACH     | DLQI                    | 12 ± 7.11        |
|  | Radtke, 2019  | Real-world experience with apremilast: Analysis of 250 patients from the APPRECIATE study with psoriasis in difficult-to-treat areas                          | DLQI                    | 15.7 ± 5.7       |
|  | Reich, 2010   | Skin and Nail Responses after 1 Year of Infliximab Therapy in Patients with Moderate-to-Severe Psoriasis: A Retrospective Analysis of the EXPRESS Trial       | DLQI                    | 12.9 ± 7.2       |
|  | Reich, 2018   | Effect of secukinumab on the clinical activity and disease burden of nail psoriasis: 32-week results from the randomized placebo-controlled TRANSFIGURE trial | DLQI                    | 12.9             |

|  |                                 |                                                                                                                                                 |       |                        |
|--|---------------------------------|-------------------------------------------------------------------------------------------------------------------------------------------------|-------|------------------------|
|  | Rencz, 2014                     | Moderate to severe psoriasis patients' subjective future expectations regarding health-related quality of life and longevity                    | EQ-5D | 0.63 ± 0.31            |
|  | Shear, 2016                     | Health-related quality-of-life improvements during 98 weeks of infliximab therapy in patients with plaque-type psoriasis in real-world practice | DLQI  | 12.3                   |
|  | Sojevic<br>Timotijevic,<br>2013 | Identification of psoriatic patients at risk of high quality of life impairment                                                                 | DLQI  | 12.8                   |
|  |                                 |                                                                                                                                                 | PDI   | 15                     |
|  | Thaci, 2015                     | Adalimumab for the treatment of moderate to severe psoriasis: subanalysis of effects on scalp and nails in the BELIEVE study                    | DLQI  | 14.4 ± 7.5             |
|  | Tsentemidou,<br>2017            | Prevalence of onychomycosis among patients with nail psoriasis who are not receiving immunosuppressive agents: Results of a pilot study         | DLQI  | 10.17 (7.46,<br>12.89) |
|  | Masatoshi,<br>2010              | Improvement of quality of life and clinical usefulness of cyclosporin administration in patients with nail psoriasis                            | PDI   | 15                     |

|       |                |                                                                                                                                                                             |                     |             |
|-------|----------------|-----------------------------------------------------------------------------------------------------------------------------------------------------------------------------|---------------------|-------------|
| Hands | Augustin, 2018 | Topology of psoriasis in routine care: results from high-resolution analysis of 2009 patients                                                                               | DLQI                | 9.0 ± 6.8   |
|       | Heredi, 2014   | Exploring the relationship between EQ-5D, DLQI and PASI, and mapping EQ-5D utilities: a cross-sectional study in psoriasis from Hungary                                     | EQ-5D               | 0.61 ± 0.35 |
|       |                |                                                                                                                                                                             | DLQI                | 9.53 ± 7.27 |
|       |                |                                                                                                                                                                             |                     |             |
|       | Jung, 2018     | The association of socioeconomic and clinical characteristics with health-related quality of life in patients with psoriasis: a cross-sectional study                       | DLQI                | 14.2 ± 7.7  |
|       | Imafuku, 2021  | Utility of the Dermatology Life Quality Index at initiation or switching of biologics in real-life Japanese patients with plaque psoriasis: Results from the ProLOGUE study | DLQI Median (Q1–Q3) | 7 (3–12)    |

|         |                |                                                                                                                                                                |          |           |
|---------|----------------|----------------------------------------------------------------------------------------------------------------------------------------------------------------|----------|-----------|
| Genital | Augustin, 2018 | Topology of psoriasis in routine care: results from high-resolution analysis of 2009 patients                                                                  | DLQI:    |           |
|         |                |                                                                                                                                                                | Genitals | 9.7 ± 7.2 |
|         |                |                                                                                                                                                                | Groin    | 9.4 ± 7.0 |
|         |                |                                                                                                                                                                | Anal     | 8.8 ± 6.7 |
|         | Da Silva, 2019 | Disease burden and patient needs and benefits in anogenital psoriasis: developmental specificities for person-centred healthcare of emerging adults and adults | DLQI     | 9.48      |
|         | Da Silva, 2020 | Sex-related impairment and patient needs/ benefits in anogenital psoriasis:<br><br>Difficult-to- communicate topics and their impact on patient-centred care   | DLQI     | 8.92      |
|         | Egeberg, 2020  | Epidemiology of psoriasis in hard-to-treat body locations: data from the Danish skin cohort                                                                    | DLQI     | 5.9 ± 5.6 |

|                       |                                                                                                                                                                                      |                         |                      |
|-----------------------|--------------------------------------------------------------------------------------------------------------------------------------------------------------------------------------|-------------------------|----------------------|
| Imafuku, 2021         | Utility of the Dermatology Life Quality Index at initiation or switching of biologics in real-life Japanese patients with plaque psoriasis: Results from the ProLOGUE study          | DLQI (median and range) | 6 (3-8)              |
| Larsabal, 2018        | GENIPSO: a French prospective study assessing instantaneous prevalence, clinical features and impact on quality of life of genital psoriasis among patients consulting for psoriasis | DLQI (median, range)    | 7 (0-28)             |
| Martinez-Ortega, 2019 | Quality of life, anxiety and depressive symptoms in patients with psoriasis: A case-control study                                                                                    | DLQI                    | 13.9 ± 7.2           |
| Meeuwis, 2011         | Quality of life and sexual health in patients with genital psoriasis                                                                                                                 | DLQI                    | 8.5 ± 6.5            |
| Ryan, 2013            | Genital psoriasis is associated with significant impairment in quality of life and sexual functioning                                                                                | DLQI (median, range)    | 4 (0-26)<br>3 (0-21) |
| De Belilovsky, 2018   | Effects of a topical ointment on responses to treatments used for common genital diseases and on quality of life                                                                     | DLQI                    | 9.75                 |

|            |                |                                                                                                                                                                           |                                                                                                                |
|------------|----------------|---------------------------------------------------------------------------------------------------------------------------------------------------------------------------|----------------------------------------------------------------------------------------------------------------|
| Upper limb | Augustin, 2018 | Topology of psoriasis in routine care: results from high-resolution analysis of 2009 patients                                                                             | DLQI: <ul style="list-style-type: none"><li>- Axilla 10·4 ± 7·3</li><li>- Arms 7·9 ± 6·5</li></ul>             |
|            | Imafuku, 2021  | Utility of the Dermatology Life Quality Index at initiation or switchingof biologics in real-life Japanese patients with plaque psoriasis: Resultsfrom the ProLOGUE study | DLQI (median and range) 7 (4-12)                                                                               |
| Lower limb | Jung, 2018     | The association of socioeconomic and clinical characteristics with health-related quality of life in patients with psoriasis: a cross-sectional study                     | DLQI: <ul style="list-style-type: none"><li>- Shoul- 15.2 ± 7.8</li><li>der 13.2 ± 7.8</li><li>- Arm</li></ul> |
|            | Imafuku, 2021  | Utility of the Dermatology Life Quality Index at initiation or switchingof biologics in real-life Japanese patients with plaque psoriasis: Resultsfrom the ProLOGUE study | DLQI (median and range): 7 (3-12)<br>lower leg                                                                 |



|      |                                 |                                                                                                                                                                   |                                  |                              |
|------|---------------------------------|-------------------------------------------------------------------------------------------------------------------------------------------------------------------|----------------------------------|------------------------------|
|      | Jung, 2018                      | The association of socioeconomic and clinical characteristics with health-related quality of life in patients with psoriasis: a cross-sectional study             | DLQI:<br><br>- Leg<br><br>- Foot | 12.4 ± 7.7<br><br>14.7 ± 7.6 |
| Sole | Egeberg, 2020                   | Epidemiology of psoriasis in hard-to-treat body locations: data from the Danish skin cohort                                                                       | DLQI                             | 5.7 ± 5.9                    |
|      | Pettey, 2003                    | Patients with palmoplantar psoriasis have more physical disability and discomfort than patients with other forms of psoriasis: Implications for clinical practice | SF-36<br><br>PDS                 | 6.2<br><br>16.9              |
|      | Sojevic<br>Timotijevic,<br>2013 | Identification of psoriatic patients at risk of high quality of life impairment                                                                                   | DLQI<br><br>PDI                  | 14.9<br><br>18.2             |
| Palm | Egeberg, 2020                   | Epidemiology of psoriasis in hard-to-treat body locations: data from the Danish skin cohort                                                                       | DLQI                             | 5.7 ± 5.8                    |

|              |                                     |                                                                                                                                                                   |                                         |                                    |
|--------------|-------------------------------------|-------------------------------------------------------------------------------------------------------------------------------------------------------------------|-----------------------------------------|------------------------------------|
|              | Petty, 2003                         | Patients with palmoplantar psoriasis have more physical disability and discomfort than patients with other forms of psoriasis: Implications for clinical practice | SF-36<br><br>PDS                        | 19.8<br><br>52.7                   |
|              | Sojevic<br><br>Timotijevic,<br>2013 | Identification of psoriatic patients at risk of high quality of life impairment                                                                                   | DLQI<br><br>PDI                         | 11.9<br><br>15.6                   |
| Palmoplantar | Bissonnette,<br>2018                | Apremilast for the treatment of moderate-to-severe palmoplantar psoriasis: results from a double-blind, placebo-controlled, randomized study                      | DLQI:<br><br>- Group A<br><br>- Group B | 10.4 ± 6.3<br><br>8.6 ± 6.7        |
|              | Callis Duffin,<br>2021              | Characterization of Patients with Psoriasis in Challenging-to-Treat Body Areas in the Corrona Psoriasis Registry                                                  | DLQI                                    | 10.25<br><br>(10.17–<br><br>10.32) |

|  |                |                                                                                                                                                  |                          |                 |
|--|----------------|--------------------------------------------------------------------------------------------------------------------------------------------------|--------------------------|-----------------|
|  | Chung, 2014    | Palmoplantar psoriasis is associated with greater impairment of health-related quality of life compared with moderate to severe plaque psoriasis | DLQI (median and range)  | 4 (1-9)         |
|  |                |                                                                                                                                                  | EQ-5D (median and range) | 0.83 (0.75-1.0) |
|  | Gottlieb, 2017 | Secukinumab shows significant efficacy in palmoplantar psoriasis: Results from GESTURE, a randomized controlled trial                            | DLQI                     | 13.33           |
|  | Heredi, 2014   | Exploring the relationship between EQ-5D, DLQI and PASI, and mapping EQ-5D utilities: a cross-sectional study in psoriasis from Hungary          | EQ-5D                    | 0.36 ± 0.39     |
|  |                |                                                                                                                                                  | DLQI                     | 11.42 ± 6.82    |
|  | Moradi, 2014   | A comparative cross-sectional study on health-related quality of life in psoriasis from Hungary and Iran                                         | EQ-5D                    | 0.36±0.3        |

|               |                |                                                                                                                                                       |       |             |
|---------------|----------------|-------------------------------------------------------------------------------------------------------------------------------------------------------|-------|-------------|
|               | Rencz, 2014    | Moderate to severe psoriasis patients' subjective future expectations regarding health-related quality of life and longevity                          | EQ-5D | 0.48 ± 0.31 |
|               | Richetta, 2012 | Safety and efficacy of Adalimumab in the treatment of moderate to severe palmo-plantar psoriasis: an open label study                                 | DLQI  | 12.27       |
| Inverse       | Cohen, 2016    | Shedding Light on the "Hidden Psoriasis": A Pilot Study of the Inverse Psoriasis Burden of Disease (IPBOD) Questionnaire                              | DLQI  | 8.5         |
|               |                |                                                                                                                                                       | IPBOD | 4.9         |
|               | Rencz, 2014    | Moderate to severe psoriasis patients' subjective future expectations regarding health-related quality of life and longevity                          | EQ-5D | 0.61 ± 0.33 |
| Chest/abdomen | Jung, 2018     | The association of socioeconomic and clinical characteristics with health-related quality of life in patients with psoriasis: a cross-sectional study | DLQI  | 13.5 ± 7.6  |
| Back/buttocks | Jung, 2018     | The association of socioeconomic and clinical characteristics with health-related quality of life in patients with psoriasis: a cross-sectional study | DLQI  | 13.5 ± 7.7  |

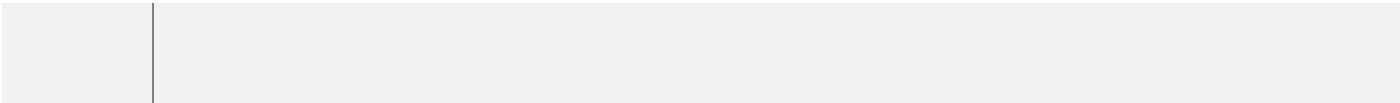

Supplement: mmc1 [file S0001731022007608:mmc1.pdf]
